# Supplementary material for: Isolation and Characterization of Phages Active against Paenibacillus larvae Causing American Foulbrood in Honeybees in Poland
Source: MDPI journal article supplement (doi:10.3390/v13071217), 2021-06-23
Supplement: s1 [file s1]

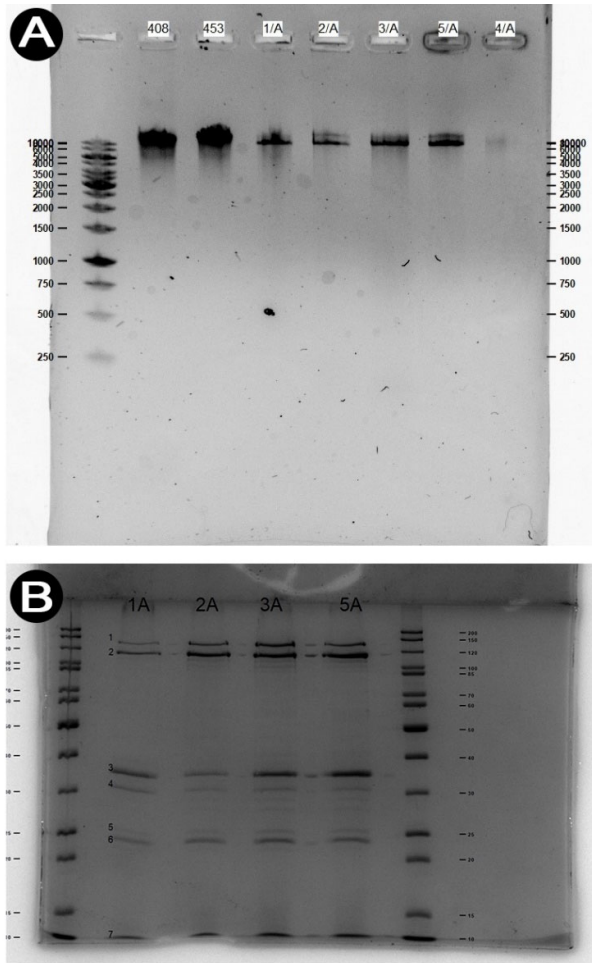

Figure S1 A) DNA isolated from *Paenibacillus larvae* 408, 453 and phages 1A-5/A, B) Protein profiles of 1/A-5/A bacteriophages

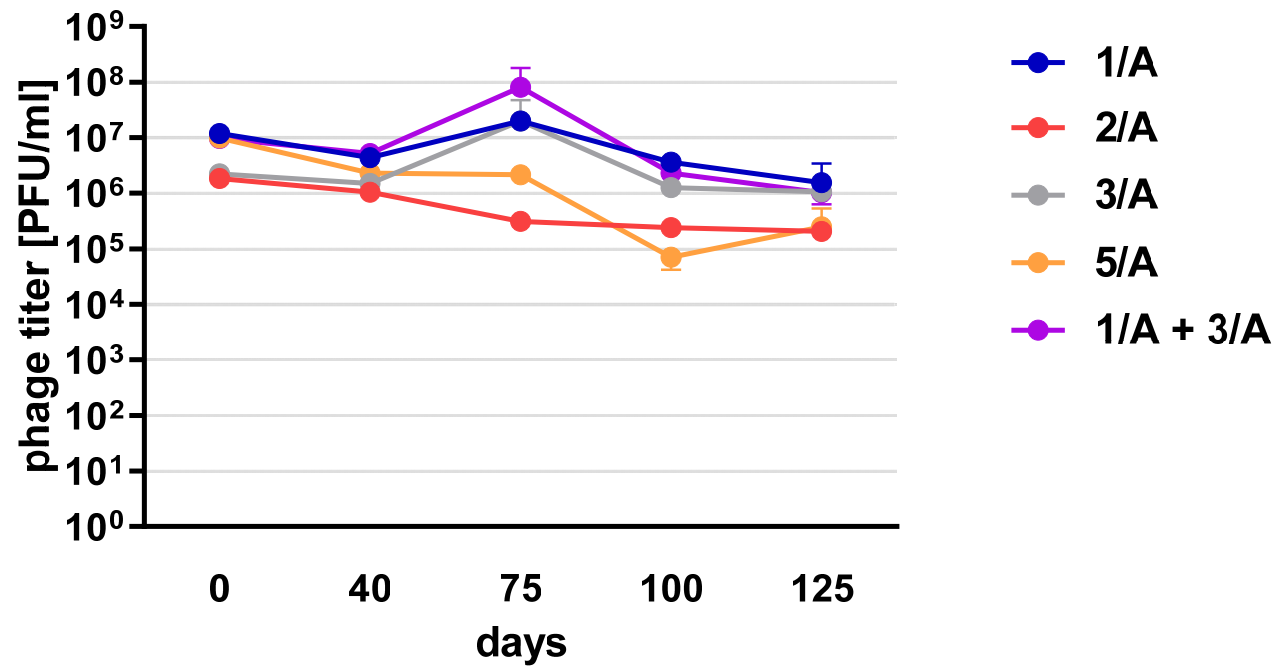

**Figure S2.** The stability of lyophilized phages with 10% glucose. Error bars represent standard deviation ( $\pm$ SD) of mean phage titer.

# PHAGE 1A

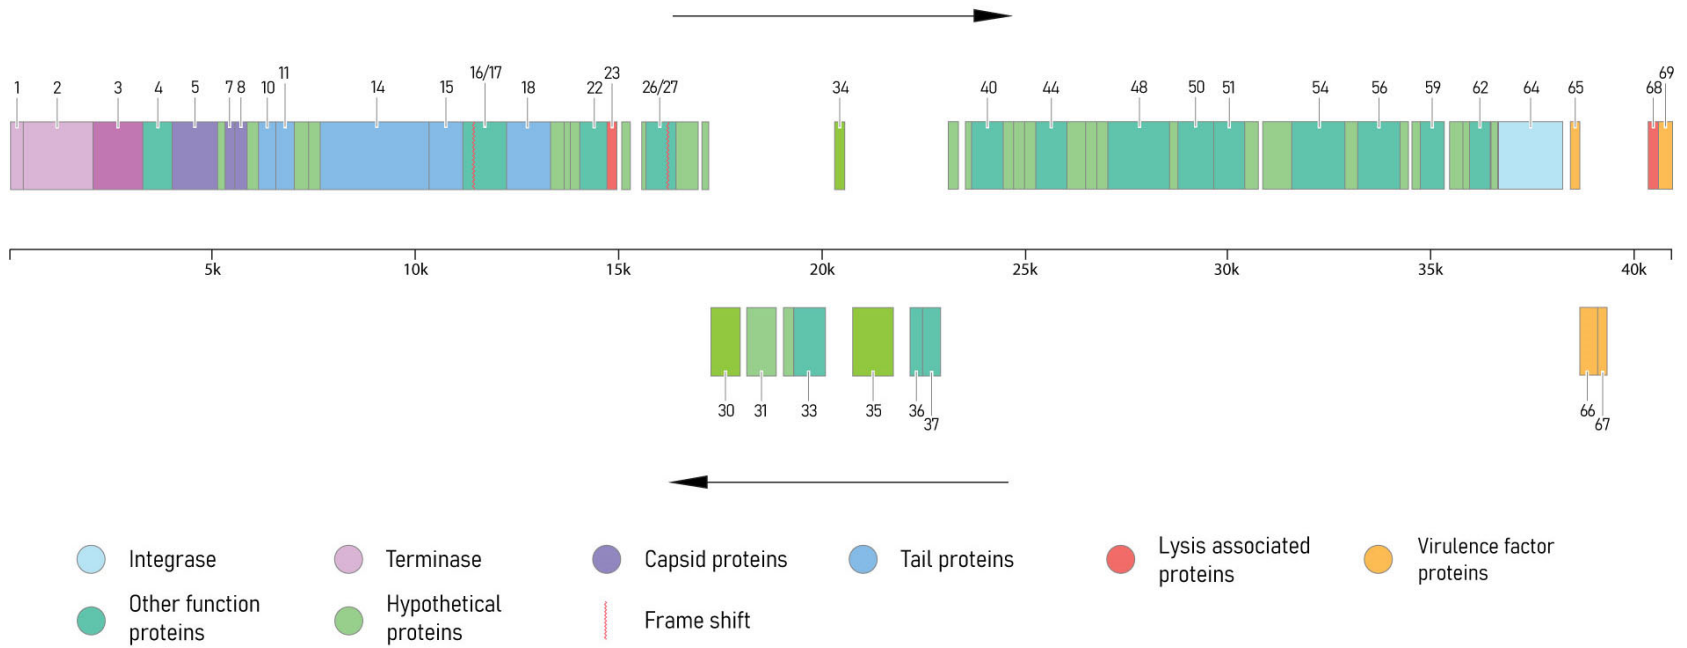

## PHAGE 2A

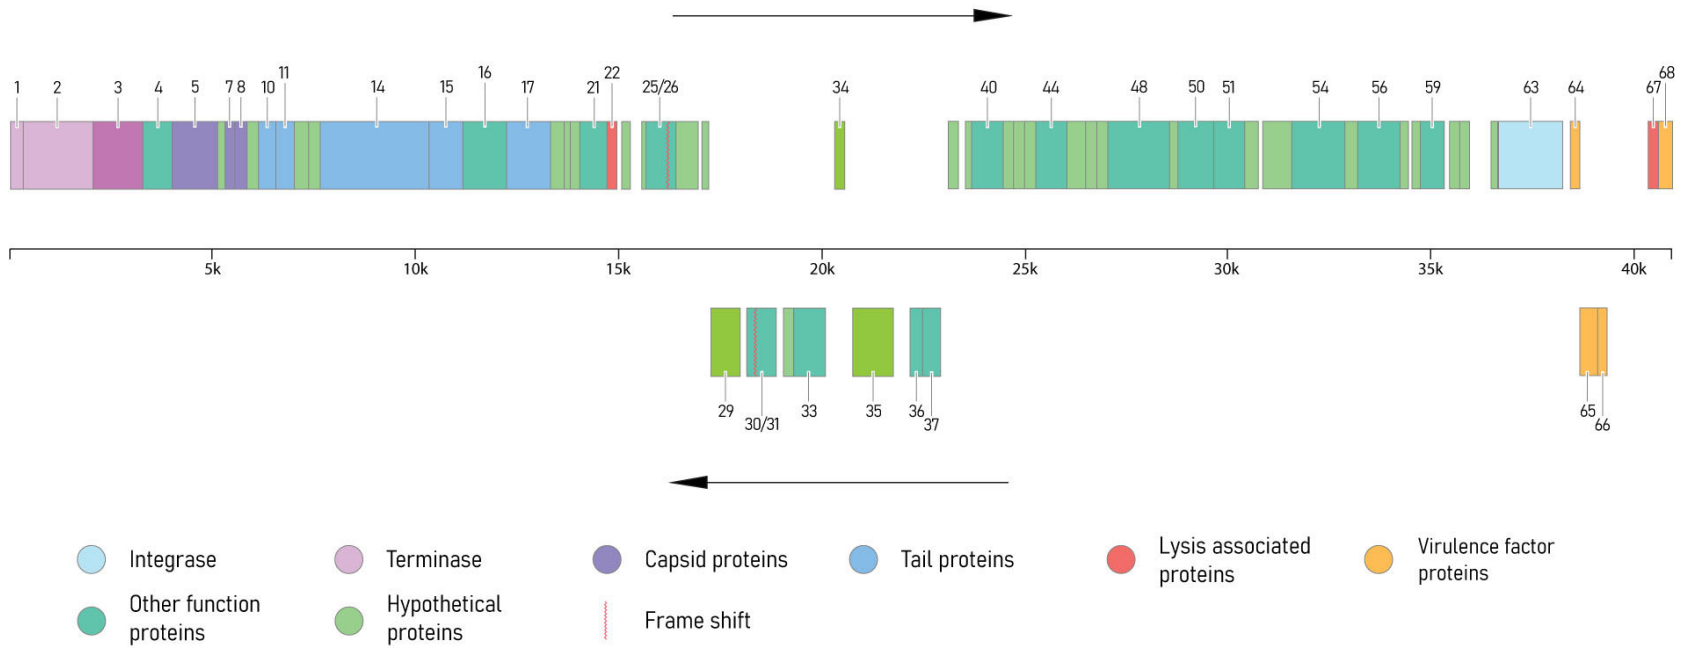

# PHAGE 3A

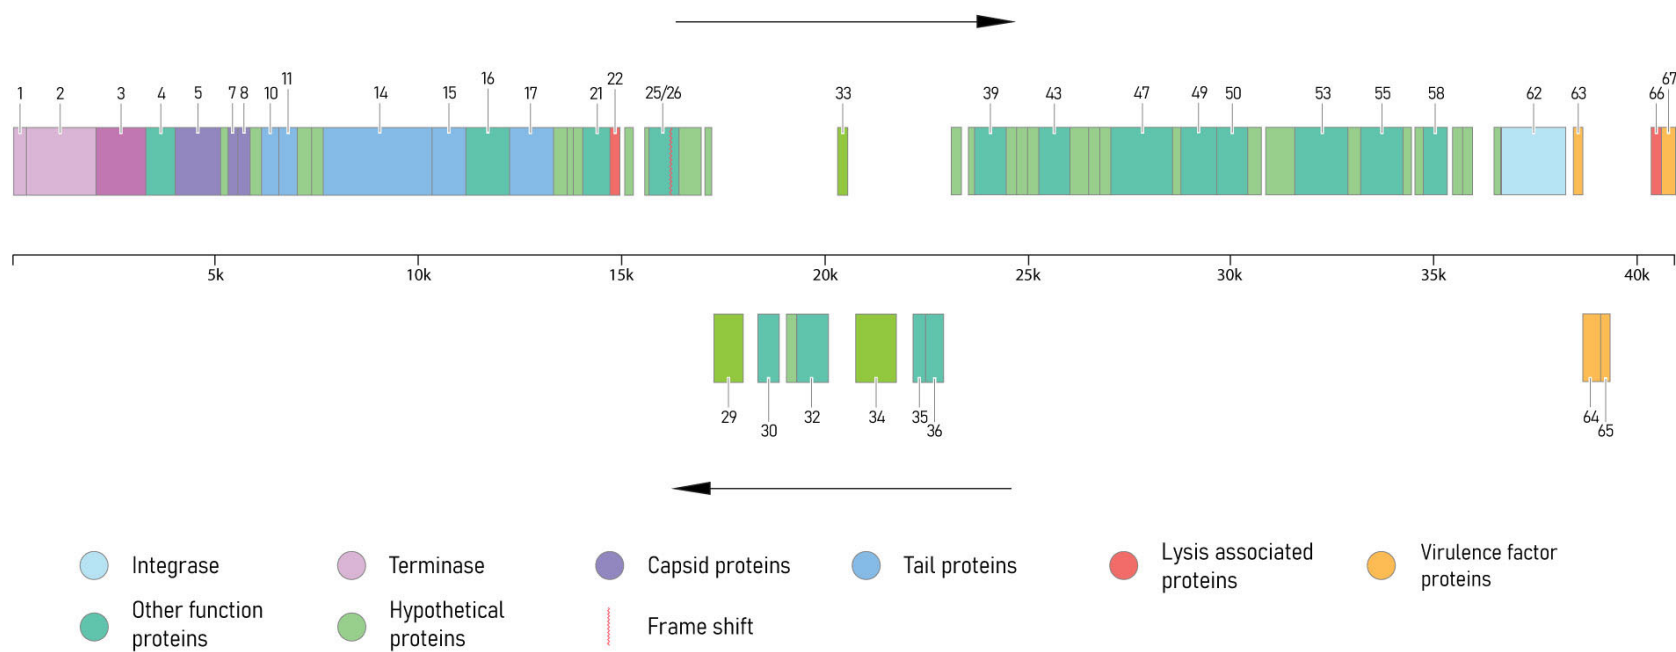

# PHAGE 4A

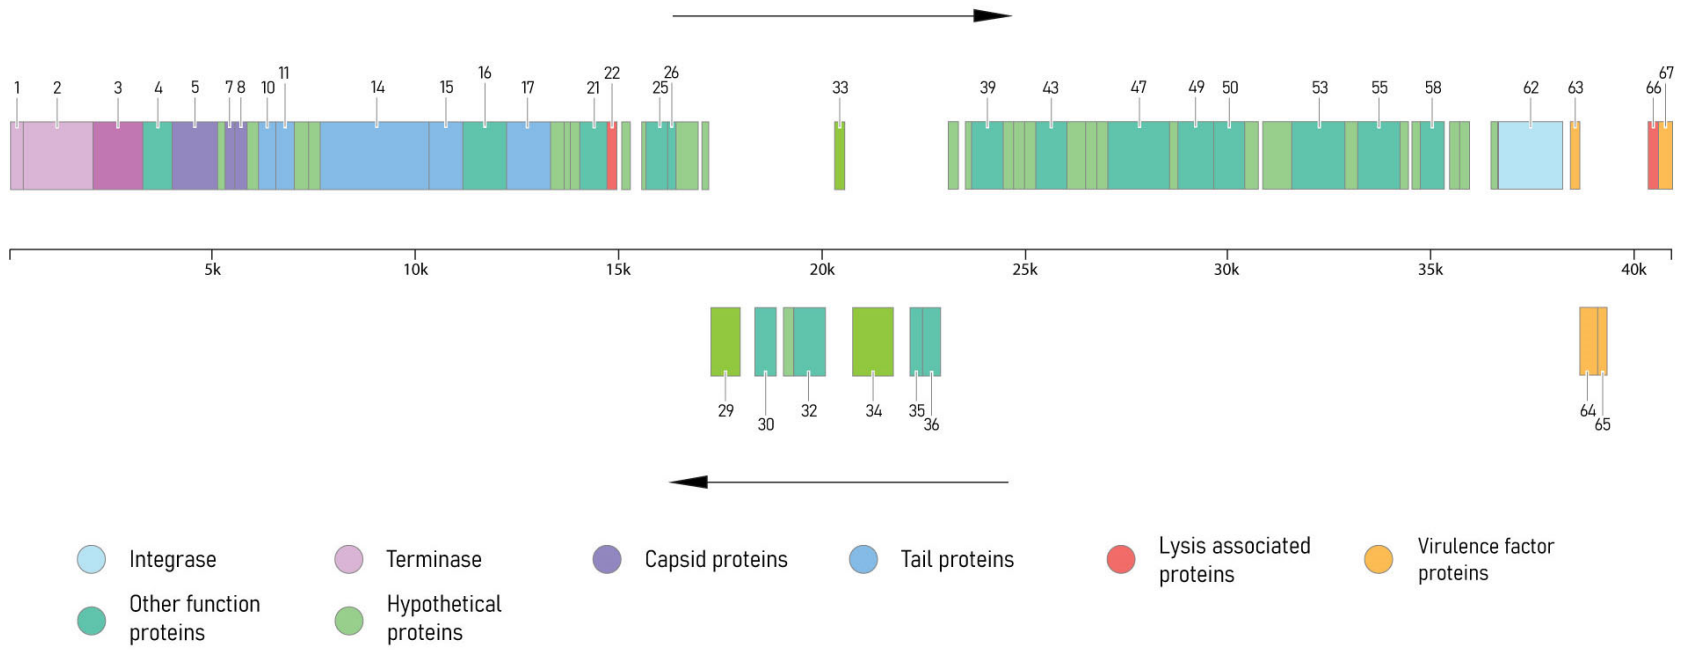

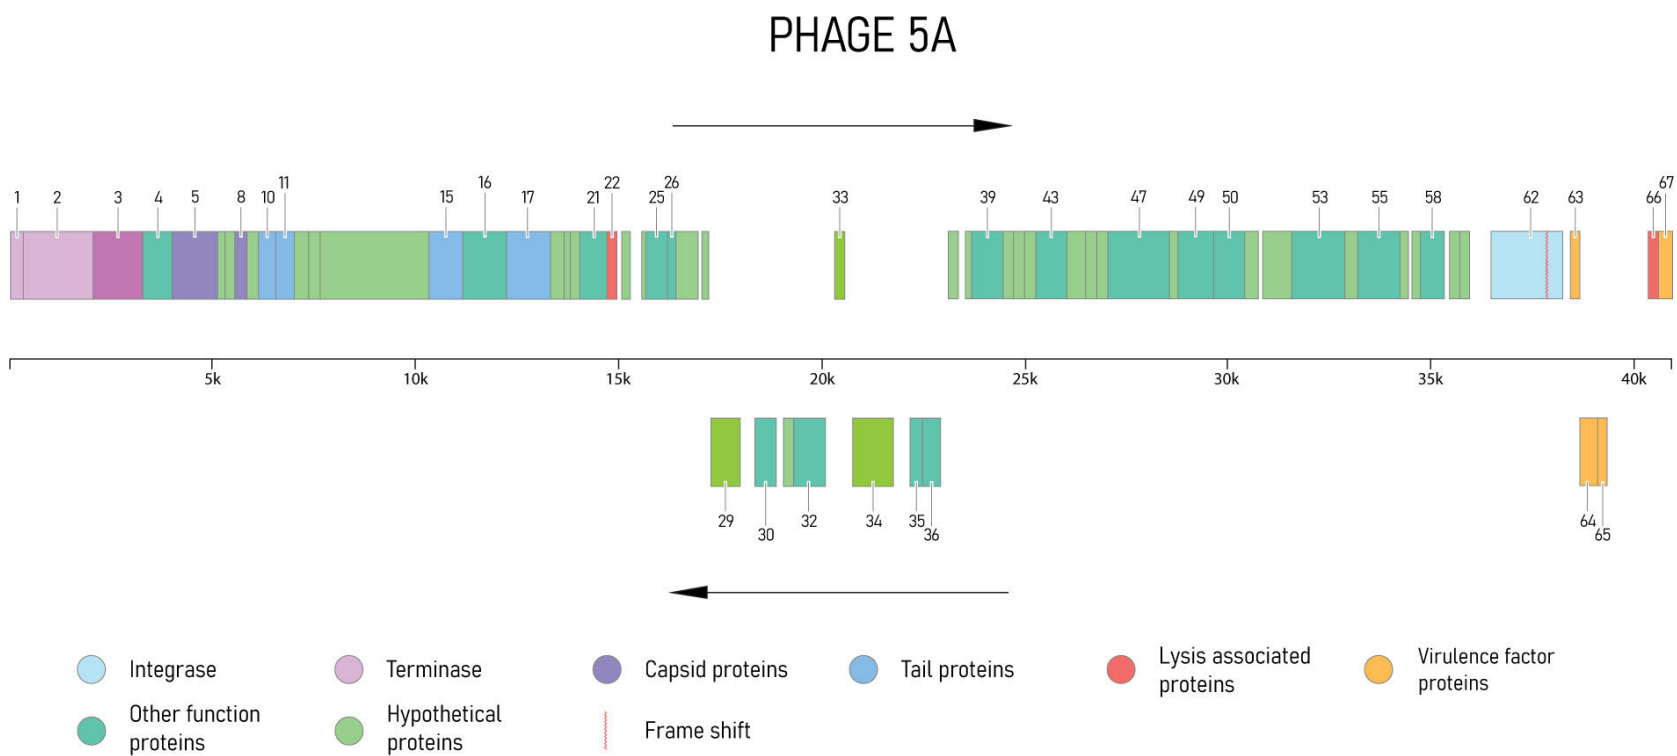

**Figure S3.** Genomics maps of studied phages 1-5/A

Table S1. Annotation table of phage 1/A

| #  | Location |       | Strand | Size |     | Probable function                             | Homologue      | Comments                       |
|----|----------|-------|--------|------|-----|-----------------------------------------------|----------------|--------------------------------|
|    | Start    | End   |        | nt   | aa  |                                               |                |                                |
| 1  | 45       | 359   | +      | 315  | 104 | terminase, small subunit                      | YP_009195191.1 | -                              |
| 2  | 340      | 2064  | +      | 1725 | 574 | terminase, large subunit                      | YP_008320338.1 | -                              |
| 3  | 2061     | 3314  | +      | 1254 | 417 | portal protein                                | YP_009203205.1 | -                              |
| 4  | 3298     | 4020  | +      | 723  | 240 | Clp, protease                                 | YP_009203206.1 | -                              |
| 5  | 4017     | 5147  | +      | 1131 | 376 | major capsid protein                          | YP_008320341.1 | -                              |
| 6  | 5125     | 5298  | +      | 174  | 57  | hypothetical protein                          | YP_008320342.1 | -                              |
| 7  | 5291     | 5554  | +      | 264  | 87  | head-tail connector protein                   | YP_008320343.1 | -                              |
| 8  | 5551     | 5868  | +      | 318  | 105 | head closure protein                          | YP_008320344.1 | -                              |
| 9  | 5868     | 6128  | +      | 261  | 86  | hypothetical protein                          | YP_009195199.1 | -                              |
| 10 | 6138     | 6578  | +      | 441  | 146 | tail protein                                  | YP_008320346.1 | -                              |
| 11 | 6580     | 7017  | +      | 438  | 145 | major tail protein                            | YP_008320347.1 | -                              |
| 12 | 7014     | 7352  | +      | 339  | 112 | hypothetical protein                          | YP_009195202.1 | -                              |
| 13 | 7379     | 7633  | +      | 255  | 84  | hypothetical protein                          | YP_008320349.1 | -                              |
| 14 | 7693     | 10329 | +      | 2637 | 878 | tail tape measure protein                     | YP_008320350.1 | -                              |
| 15 | 10326    | 11177 | +      | 852  | 283 | tail protein                                  | YP_008320351.1 | -                              |
| 16 | 11180    | 11440 | +      | 261  | 86  | <i>Siphovirus</i> ReqiPepy6 Gp37-like protein | YP_008320352.1 | Potential reading frame shift. |
| 17 | 11445    | 12239 | +      | 795  | 264 | <i>Siphovirus</i> ReqiPepy6 Gp37-like protein | YP_008320352.1 |                                |
| 18 | 12236    | 13318 | +      | 1083 | 360 | tail protein                                  | YP_009201927.1 | -                              |
| 19 | 13319    | 13666 | +      | 348  | 115 | hypothetical protein                          | YP_009201928.1 | -                              |
| 20 | 13663    | 13824 | +      | 162  | 53  | hypothetical protein                          | YP_009197964.1 | -                              |



|    |       |       |   |     |     |                                            |                |                                |
|----|-------|-------|---|-----|-----|--------------------------------------------|----------------|--------------------------------|
| 21 | 13805 | 14044 | + | 240 | 79  | hypothetical protein                       | YP_009197965.1 | -                              |
| 22 | 14041 | 14715 | + | 675 | 224 | N-acetylmuramoyl-L-alanine amidase         | YP_009201931.1 | -                              |
| 23 | 14725 | 14967 | + | 243 | 80  | holin                                      | YP_009197967.1 | -                              |
| 24 | 15101 | 15292 | + | 192 | 63  | hypothetical protein                       | YP_009197968.1 | -                              |
| 25 | 15574 | 15684 | + | 111 | 36  | hypothetical protein                       | YP_009197969.1 | -                              |
| 26 | 15681 | 16202 | + | 522 | 173 | amidase domain-containing protein          | YP_009197970.1 | Potential reading frame shift. |
| 27 | 16199 | 16387 | + | 189 | 62  | amidase domain-containing protein          | YP_009197970.1 |                                |
| 28 | 16423 | 16947 | + | 525 | 174 | hypothetical protein                       | YP_009197971.1 | -                              |
| 29 | 17111 | 17218 | + | 108 | 35  | hypothetical protein                       | YP_009197972.1 | -                              |
| 30 | 17280 | 17999 | - | 720 | 239 | transposase                                | YP_009201939.1 | -                              |
| 31 | 18170 | 18853 | - | 684 | 227 | helix-turn-helix domain-containing protein | YP_009197974.1 | -                              |
| 32 | 19339 | 19542 | - | 204 | 67  | hypothetical protein                       | YP_009197976.1 | -                              |
| 33 | 19544 | 20092 | - | 549 | 182 | YolD-like family protein                   | YP_009197977.1 | -                              |
| 34 | 20334 | 20588 | + | 255 | 84  | transposase                                | YP_009197978.1 | -                              |
| 35 | 20786 | 21475 | - | 690 | 229 | transposase                                | YP_009197979.1 | -                              |
| z  | 21481 | 21762 | - | 282 | 93  | helix-turn-helix transcriptional regulator | YP_009197980.1 | -                              |
| 37 | 22472 | 22933 | - | 462 | 153 | helix-turn-helix domain-containing protein | YP_009197981.1 | -                              |
| 38 | 23134 | 23391 | + | 258 | 85  | hypothetical protein                       | YP_009201956.1 | -                              |
| 39 | 23537 | 23692 | + | 156 | 51  | hypothetical protein                       | YP_009201956.1 | -                              |
| 40 | 23718 | 24458 | + | 741 | 246 | antirepressor                              | YP_009197983.1 | -                              |
| 41 | 24485 | 24703 | + | 219 | 72  | hypothetical protein                       | YP_009201958.1 | -                              |
| 42 | 24727 | 24996 | + | 270 | 89  | hypothetical protein                       | YP_009201959.1 | -                              |
| 43 | 24993 | 25265 | + | 273 | 90  | hypothetical protein                       | YP_009201960.1 | -                              |

|    |       |       |   |      |     |                                                      |                |   |
|----|-------|-------|---|------|-----|------------------------------------------------------|----------------|---|
| 44 | 25292 | 26050 | + | 759  | 252 | antirepressor                                        | YP_009201961.1 | - |
| 45 | 26047 | 26526 | + | 480  | 159 | hypothetical protein                                 | YP_009201962.1 | - |
| 46 | 26516 | 26764 | + | 249  | 82  | hypothetical protein                                 | YP_009201963.1 | - |
| 47 | 26769 | 27059 | + | 291  | 96  | hypothetical protein                                 | YP_009197985.1 | - |
| 48 | 27043 | 28575 | + | 1533 | 510 | ATPase                                               | YP_009197986.1 | - |
| 49 | 28562 | 28759 | + | 198  | 65  | hypothetical protein                                 | YP_009197987.1 | - |
| 50 | 28762 | 29664 | + | 903  | 300 | recombinase RecT                                     | YP_009197988.1 | - |
| 51 | 29677 | 30435 | + | 759  | 252 | MBL fold metallo-hydrolase                           | YP_009197989.1 | - |
| 52 | 30432 | 30746 | + | 315  | 104 | hypothetical protein                                 | YP_008320387.1 | - |
| 53 | 30760 | 31590 | + | 831  | 276 | hypothetical protein                                 | YP_008320388.1 | - |
| 54 | 31556 | 32878 | + | 1323 | 440 | DNA helicase                                         | YP_009197992.1 | - |
| 55 | 32875 | 33186 | + | 312  | 103 | hypothetical protein                                 | YP_009201972.1 | - |
| 56 | 33179 | 34234 | + | 1056 | 351 | DNA (cytosine-5-)-methyltransferase                  | YP_009201973.1 | - |
| 57 | 34221 | 34430 | + | 210  | 69  | hypothetical protein                                 | YP_009201974.1 | - |
| 58 | 34515 | 34685 | - | 171  | 56  | hypothetical protein                                 | -              | - |
| 59 | 34721 | 35311 | + | 591  | 196 | resolvase                                            | YP_009838694.1 | - |
| 60 | 35470 | 35775 | + | 306  | 101 | hypothetical protein                                 | YP_009201977.1 | - |
| 61 | 35787 | 35936 | + | 150  | 49  | hypothetical protein                                 | YP_009838964.1 | - |
| 62 | 35987 | 36445 | + | 459  | 152 | transcriptional regulator                            | YP_009201978.1 | - |
| 63 | 36457 | 36738 | + | 282  | 93  | hypothetical protein                                 | YP_009201979.1 | - |
| 64 | 36677 | 38239 | + | 1563 | 520 | integrase                                            | YP_009201980.1 | - |
| 65 | 38379 | 38654 | + | 276  | 91  | phosphomannomutase                                   | YP_009201981.1 | - |
| 66 | 38683 | 39093 | - | 411  | 136 | type II toxin-antitoxin system HicB family antitoxin | YP_009201982.1 | - |

|    |       |       |   |     |     |                                                  |                |   |
|----|-------|-------|---|-----|-----|--------------------------------------------------|----------------|---|
| 67 | 39124 | 39360 | - | 237 | 78  | type II toxin-antitoxin system HicA family toxin | YP_009201983.1 | - |
| 68 | 40337 | 40603 | + | 267 | 88  | transglycosylase                                 | YP_009201986.1 | - |
| 69 | 40600 | 40938 | + | 339 | 112 | HNH endonuclease                                 | YP_009201987.1 | - |

Table S2. Annotation table of phage 2/A

| #  | Location |       | Strand | Size |     | Probable function           | Homologue      | Comments |
|----|----------|-------|--------|------|-----|-----------------------------|----------------|----------|
|    | Start    | End   |        | nt   | aa  |                             |                |          |
| 1  | 2        | 304   | +      | 303  | 100 | terminase, small subunit    | YP_009195191.1 | -        |
| 2  | 285      | 2009  | +      | 1725 | 574 | terminase, large subunit    | YP_008320338.1 | -        |
| 3  | 2006     | 3259  | +      | 1254 | 417 | portal protein              | YP_009203205.1 | -        |
| 4  | 3243     | 3965  | +      | 723  | 240 | Clp, protease               | YP_009203206.1 | -        |
| 5  | 3962     | 5092  | +      | 1131 | 376 | major capsid protein        | YP_008320341.1 | -        |
| 6  | 5070     | 5243  | +      | 174  | 57  | hypothetical protein        | YP_008320342.1 | -        |
| 7  | 5236     | 5499  | +      | 264  | 87  | head-tail connector protein | YP_008320343.1 | -        |
| 8  | 5496     | 5813  | +      | 318  | 105 | head closure protein        | YP_008320344.1 | -        |
| 9  | 5813     | 6241  | +      | 429  | 142 | hypothetical protein        | YP_008320345.1 | -        |
| 10 | 6225     | 6620  | +      | 396  | 131 | tail protein                | YP_008320346.1 | -        |
| 11 | 6622     | 7059  | +      | 438  | 145 | major tail protein          | YP_008320347.1 | -        |
| 12 | 7056     | 7394  | +      | 339  | 112 | hypothetical protein        | YP_009195202.1 | -        |
| 13 | 7421     | 7675  | +      | 255  | 84  | hypothetical protein        | YP_008320349.1 | -        |
| 14 | 7735     | 10371 | +      | 2637 | 878 | tail tape measure protein   | YP_008320350.1 | -        |
| 15 | 10368    | 11219 | +      | 852  | 283 | tail protein                | YP_008320351.1 | -        |

|    |       |       |   |      |     |                                                  |                |                                   |
|----|-------|-------|---|------|-----|--------------------------------------------------|----------------|-----------------------------------|
| 16 | 11222 | 12340 | + | 1119 | 372 | <i>Siphovirus</i> ReqiPepy6<br>Gp37-like protein | YP_008320352.1 | -                                 |
| 17 | 12337 | 13419 | + | 1083 | 360 | tail protein                                     | YP_009201927.1 | -                                 |
| 18 | 13420 | 13767 | + | 348  | 115 | hypothetical protein                             | YP_009201928.1 | -                                 |
| 19 | 13764 | 13925 | + | 162  | 53  | hypothetical protein                             | YP_009197964.1 | -                                 |
| 20 | 13906 | 14145 | + | 240  | 79  | hypothetical protein                             | YP_009197965.1 | -                                 |
| 21 | 14142 | 14816 | + | 675  | 224 | N-acetylmuramoyl-L-<br>alanine amidase           | YP_009201931.1 | -                                 |
| 22 | 14826 | 15068 | + | 243  | 80  | holin                                            | YP_009197967.1 | -                                 |
| 23 | 15202 | 15393 | + | 192  | 63  | hypothetical protein                             | YP_009197968.1 | -                                 |
| 24 | 15675 | 15785 | + | 111  | 36  | hypothetical protein                             | YP_009197969.1 | -                                 |
| 25 | 15782 | 16303 | + | 522  | 173 | amidase domain-<br>containing protein            | YP_009197970.1 | -                                 |
| 26 | 16300 | 16488 | + | 189  | 62  | amidase domain-<br>containing protein            | YP_009197970.1 | -                                 |
| 27 | 16524 | 17048 | + | 525  | 174 | hypothetical protein                             | YP_009197971.1 | -                                 |
| 28 | 17212 | 17319 | + | 108  | 35  | hypothetical protein                             | YP_009197972.1 | -                                 |
| 29 | 17381 | 18100 | - | 720  | 239 | transposase                                      | YP_009201939.1 | -                                 |
| 30 | 18271 | 18438 | - | 168  | 55  | helix-turn-helix domain-<br>containing protein   | YP_009197974.1 | Potential reading<br>frame shift. |
| 31 | 18454 | 18987 | - | 534  | 177 | helix-turn-helix domain-<br>containing protein   | YP_009197974.1 |                                   |
| 32 | 19473 | 19676 | - | 204  | 67  | hypothetical protein                             | YP_009197976.1 | -                                 |
| 33 | 19678 | 20226 | - | 549  | 182 | YolD-like family protein                         | YP_009197977.1 | -                                 |
| 34 | 20468 | 20722 | + | 255  | 84  | transposase                                      | YP_009197978.1 | -                                 |
| 35 | 20920 | 21609 | - | 690  | 229 | transposase                                      | YP_009197979.1 | -                                 |
| 36 | 21615 | 21896 | - | 282  | 93  | helix-turn-helix<br>transcriptional regulator    | YP_009197980.1 | -                                 |

|    |       |       |   |      |     |                                            |                |   |
|----|-------|-------|---|------|-----|--------------------------------------------|----------------|---|
| 37 | 22606 | 23067 | - | 462  | 153 | helix-turn-helix domain-containing protein | YP_009197981.1 | - |
| 38 | 23268 | 23525 | + | 258  | 85  | hypothetical protein                       | YP_009201956.1 | - |
| 39 | 23671 | 23826 | + | 156  | 51  | hypothetical protein                       | YP_009201956.1 | - |
| 40 | 23852 | 24592 | + | 741  | 246 | antirepressor                              | YP_009197983.1 | - |
| 41 | 24619 | 24837 | + | 219  | 72  | hypothetical protein                       | YP_009201958.1 | - |
| 42 | 24861 | 25130 | + | 270  | 89  | hypothetical protein                       | YP_009201959.1 | - |
| 43 | 25127 | 25399 | + | 273  | 90  | hypothetical protein                       | YP_009201960.1 | - |
| 44 | 25426 | 26184 | + | 759  | 252 | antirepressor                              | YP_009201961.1 | - |
| 45 | 26181 | 26660 | + | 480  | 159 | hypothetical protein                       | YP_009201962.1 | - |
| 46 | 26650 | 26898 | + | 249  | 82  | hypothetical protein                       | YP_009201963.1 | - |
| 47 | 26903 | 27193 | + | 291  | 96  | hypothetical protein                       | YP_009197985.1 | - |
| 48 | 27177 | 28709 | + | 1533 | 510 | ATPase                                     | YP_009197986.1 | - |
| 49 | 28696 | 28893 | + | 198  | 65  | hypothetical protein                       | YP_009197987.1 | - |
| 50 | 28896 | 29798 | + | 903  | 300 | recombinase RecT                           | YP_009197988.1 | - |
| 51 | 29811 | 30569 | + | 759  | 252 | MBL fold metallo-hydrolase                 | YP_009197989.1 | - |
| 52 | 30566 | 30880 | + | 315  | 104 | hypothetical protein                       | YP_008320387.1 | - |
| 53 | 30894 | 31724 | + | 831  | 276 | hypothetical protein                       | YP_008320388.1 | - |
| 54 | 31690 | 33012 | + | 1323 | 440 | DNA helicase                               | YP_009197992.1 | - |
| 55 | 33009 | 33320 | + | 312  | 103 | hypothetical protein                       | YP_009201972.1 | - |
| 56 | 33313 | 34368 | + | 1056 | 351 | DNA (cytosine-5-)-methyltransferase        | YP_009201973.1 | - |
| 57 | 34355 | 34564 | + | 210  | 69  | hypothetical protein                       | YP_009201974.1 | - |
| 58 | 34649 | 34819 | - | 171  | 56  | hypothetical protein                       | -              | - |
| 59 | 34855 | 35445 | + | 591  | 196 | resolvase                                  | YP_009838694.1 | - |
| 60 | 35604 | 36062 | + | 459  | 152 | hypothetical protein                       | YP_009201977.1 | - |
| 61 | 36113 | 36571 | + | 459  | 152 | hypothetical protein                       | YP_009201978.1 | - |

|    |       |       |   |      |     |                                                            |                |   |
|----|-------|-------|---|------|-----|------------------------------------------------------------|----------------|---|
| 62 | 36583 | 36864 | + | 282  | 93  | hypothetical protein                                       | YP_009201979.1 | - |
| 63 | 36803 | 38365 | + | 1563 | 520 | integrase                                                  | YP_009201980.1 | - |
| 64 | 38505 | 38780 | + | 276  | 91  | phosphomannomutase                                         | YP_009201981.1 | - |
| 65 | 38809 | 39219 | - | 411  | 136 | type II toxin-antitoxin<br>system HicB family<br>antitoxin | YP_009201982.1 | - |
| 66 | 39250 | 39486 | - | 237  | 78  | type II toxin-antitoxin<br>system HicA family toxin        | YP_009201983.1 | - |
| 67 | 40462 | 40728 | + | 267  | 88  | transglycosylase                                           | YP_009201986.1 | - |
| 68 | 40725 | 41063 | + | 339  | 112 | HNH endonuclease                                           | YP_009201987.1 | - |

Table S3. Annotation table of phage 3/A

| #  | Location |      | Strand | Size |     | Probable function              | Homologue      | Comments |
|----|----------|------|--------|------|-----|--------------------------------|----------------|----------|
|    | Start    | End  |        | nt   | aa  |                                |                |          |
| 1  | 1        | 303  | +      | 303  | 100 | terminase, small subunit       | YP_009195191.1 | -        |
| 2  | 284      | 2008 | +      | 1725 | 574 | terminase, large subunit       | YP_008320338.1 | -        |
| 3  | 2005     | 3258 | +      | 1254 | 417 | portal protein                 | YP_009203205.1 | -        |
| 4  | 3242     | 3964 | +      | 723  | 240 | Clp, protease                  | YP_009203206.1 | -        |
| 5  | 3961     | 5091 | +      | 1131 | 376 | major capsid protein           | YP_008320341.1 | -        |
| 6  | 5069     | 5242 | +      | 174  | 57  | hypothetical protein           | YP_008320342.1 | -        |
| 7  | 5235     | 5498 | +      | 264  | 87  | head-tail connector<br>protein | YP_008320343.1 | -        |
| 8  | 5495     | 5812 | +      | 318  | 105 | head closure protein           | YP_008320344.1 | -        |
| 9  | 5812     | 6240 | +      | 429  | 142 | hypothetical protein           | YP_008320345.1 | -        |
| 10 | 6224     | 6619 | +      | 396  | 131 | tail protein                   | YP_008320346.1 | -        |
| 11 | 6621     | 7058 | +      | 438  | 145 | major tail protein             | YP_008320347.1 | -        |

|    |       |       |   |      |     |                                               |                |                                |
|----|-------|-------|---|------|-----|-----------------------------------------------|----------------|--------------------------------|
| 12 | 7055  | 7393  | + | 339  | 112 | hypothetical protein                          | YP_009195202.1 | -                              |
| 13 | 7420  | 7674  | + | 255  | 84  | hypothetical protein                          | YP_008320349.1 | -                              |
| 14 | 7734  | 10370 | + | 2637 | 878 | tail tape measure protein                     | YP_008320350.1 | -                              |
| 15 | 10367 | 11218 | + | 852  | 283 | tail protein                                  | YP_008320351.1 | -                              |
| 16 | 11221 | 12339 | + | 1119 | 372 | <i>Siphovirus</i> ReqiPepy6 Gp37-like protein | YP_008320352.1 | -                              |
| 17 | 12336 | 13418 | + | 1083 | 360 | tail protein                                  | YP_009201927.1 | -                              |
| 18 | 13419 | 13766 | + | 348  | 115 | hypothetical protein                          | YP_009201928.1 | -                              |
| 19 | 13763 | 13924 | + | 162  | 53  | hypothetical protein                          | YP_009197964.1 | -                              |
| 20 | 13905 | 14144 | + | 240  | 79  | hypothetical protein                          | YP_009197965.1 | -                              |
| 21 | 14141 | 14815 | + | 675  | 224 | N-acetylmuramoyl-L-alanine amidase            | YP_009201931.1 | -                              |
| 22 | 14825 | 15067 | + | 243  | 80  | holin                                         | YP_009197967.1 | -                              |
| 23 | 15201 | 15392 | + | 192  | 63  | hypothetical protein                          | YP_009197968.1 | -                              |
| 24 | 15674 | 15784 | + | 111  | 36  | hypothetical protein                          | YP_009197969.1 | -                              |
| 25 | 15781 | 16302 | + | 522  | 173 | amidase domain-containing protein             | YP_009197970.1 | Potential reading frame shift. |
| 26 | 16299 | 16487 | + | 189  | 62  | amidase domain-containing protein             | YP_009197970.1 |                                |
| 27 | 16523 | 17047 | + | 525  | 174 | hypothetical protein                          | YP_009197971.1 | -                              |
| 28 | 17211 | 17318 | + | 108  | 35  | hypothetical protein                          | YP_009197972.1 | -                              |
| 29 | 17380 | 18294 | - | 915  | 304 | transposase                                   | YP_009201939.1 | -                              |
| 30 | 18366 | 19019 | - | 654  | 217 | helix-turn-helix transcriptional regulator    | YP_009197974.1 | -                              |
| 31 | 19505 | 19708 | - | 204  | 67  | hypothetical protein                          | YP_009197976.1 | -                              |
| 32 | 19710 | 20258 | - | 549  | 182 | YolD-like family protein                      | YP_009197977.1 | -                              |
| 33 | 20500 | 20754 | + | 255  | 84  | transposase                                   | YP_009197978.1 | -                              |
| 34 | 20952 | 21641 | - | 690  | 229 | transposase                                   | YP_009197979.1 | -                              |

|    |       |       |   |      |     |                                            |                |   |
|----|-------|-------|---|------|-----|--------------------------------------------|----------------|---|
| 35 | 21647 | 21928 | - | 282  | 93  | helix-turn-helix transcriptional regulator | YP_009197980.1 | - |
| 36 | 22638 | 23099 | - | 462  | 153 | helix-turn-helix domain-containing protein | YP_009197981.1 | - |
| 37 | 23300 | 23557 | + | 258  | 85  | hypothetical protein                       | YP_009201956.1 | - |
| 38 | 23703 | 23858 | + | 156  | 51  | hypothetical protein                       | YP_009201956.1 | - |
| 39 | 23884 | 24624 | + | 741  | 246 | antirepressor                              | YP_009197983.1 | - |
| 40 | 24651 | 24869 | + | 219  | 72  | hypothetical protein                       | YP_009201958.1 | - |
| 41 | 24893 | 25162 | + | 270  | 89  | hypothetical protein                       | YP_009201959.1 | - |
| 42 | 25159 | 25431 | + | 273  | 90  | hypothetical protein                       | YP_009201960.1 | - |
| 43 | 25458 | 26216 | + | 759  | 252 | antirepressor                              | YP_009201961.1 | - |
| 44 | 26213 | 26692 | + | 480  | 159 | hypothetical protein                       | YP_009201962.1 | - |
| 45 | 26682 | 26930 | + | 249  | 82  | hypothetical protein                       | YP_009201963.1 | - |
| 46 | 26935 | 27225 | + | 291  | 96  | hypothetical protein                       | YP_009197985.1 | - |
| 47 | 27209 | 28741 | + | 1533 | 510 | ATPase                                     | YP_009197986.1 | - |
| 48 | 28728 | 28925 | + | 198  | 65  | hypothetical protein                       | YP_009197987.1 | - |
| 49 | 28928 | 29830 | + | 903  | 300 | recombinase RecT                           | YP_009197988.1 | - |
| 50 | 29843 | 30601 | + | 759  | 252 | MBL fold metallo-hydrolase                 | YP_009197989.1 | - |
| 51 | 30598 | 30912 | + | 315  | 104 | hypothetical protein                       | YP_008320387.1 | - |
| 52 | 30926 | 31756 | + | 831  | 276 | hypothetical protein                       | YP_008320388.1 | - |
| 53 | 31722 | 33044 | + | 1323 | 440 | DNA helicase                               | YP_009197992.1 | - |
| 54 | 33041 | 33352 | + | 312  | 103 | hypothetical protein                       | YP_009201972.1 | - |
| 55 | 33345 | 34400 | + | 1056 | 351 | DNA (cytosine-5-)-methyltransferase        | YP_009201973.1 | - |
| 56 | 34387 | 34596 | + | 210  | 69  | hypothetical protein                       | YP_009201974.1 | - |
| 57 | 34681 | 34851 | - | 171  | 56  | hypothetical protein                       | -              | - |
| 58 | 34887 | 35477 | + | 591  | 196 | resolvase                                  | YP_009838694.1 | - |



|    |       |       |   |      |     |                                                            |                |   |
|----|-------|-------|---|------|-----|------------------------------------------------------------|----------------|---|
| 59 | 35636 | 36094 | + | 459  | 152 | hypothetical protein                                       | YP_009201977.1 | - |
| 60 | 36145 | 36603 | + | 459  | 152 | hypothetical protein                                       | YP_009201978.1 | - |
| 61 | 36615 | 36896 | + | 282  | 93  | hypothetical protein                                       | YP_009201979.1 | - |
| 62 | 36835 | 38397 | + | 1563 | 520 | integrase                                                  | YP_009201980.1 | - |
| 63 | 38537 | 38812 | + | 276  | 91  | phosphomannomutase                                         | YP_009201981.1 | - |
| 64 | 38841 | 39251 | - | 411  | 136 | type II toxin-antitoxin<br>system HicB family<br>antitoxin | YP_009201982.1 | - |
| 65 | 39282 | 39518 | - | 237  | 78  | type II toxin-antitoxin<br>system HicA family toxin        | YP_009201983.1 | - |
| 66 | 40494 | 40760 | + | 267  | 88  | transglycosylase                                           | YP_009201986.1 | - |
| 67 | 40757 | 41095 | + | 339  | 112 | HNH endonuclease                                           | YP_009201987.1 | - |

Table S4. Annotation table of phage 4/A

| # | Location |      | Strand | Size |     | Probable function              | Homologue      | Comments |
|---|----------|------|--------|------|-----|--------------------------------|----------------|----------|
|   | Start    | End  |        | nt   | aa  |                                |                |          |
| 1 | 1        | 297  | +      | 297  | 98  | terminase, small subunit       | YP_009195191.1 | -        |
| 2 | 278      | 2002 | +      | 1725 | 574 | terminase, large subunit       | YP_008320338.1 | -        |
| 3 | 1999     | 3252 | +      | 1254 | 417 | portal protein                 | YP_009203205.1 | -        |
| 4 | 3236     | 3958 | +      | 723  | 240 | Clp, protease                  | YP_009203206.1 | -        |
| 5 | 3955     | 5085 | +      | 1131 | 376 | major capsid protein           | YP_008320341.1 | -        |
| 6 | 5063     | 5236 | +      | 174  | 57  | hypothetical protein           | YP_008320342.1 | -        |
| 7 | 5229     | 5492 | +      | 264  | 87  | head-tail connector<br>protein | YP_008320343.1 | -        |
| 8 | 5489     | 5806 | +      | 318  | 105 | head closure protein           | YP_008320344.1 | -        |

|    |       |       |   |      |     |                                               |                |                                |
|----|-------|-------|---|------|-----|-----------------------------------------------|----------------|--------------------------------|
| 9  | 5806  | 6234  | + | 429  | 142 | hypothetical protein                          | YP_008320345.1 | -                              |
| 10 | 6218  | 6613  | + | 396  | 131 | tail protein                                  | YP_008320346.1 | -                              |
| 11 | 6615  | 7052  | + | 438  | 145 | major tail protein                            | YP_008320347.1 | -                              |
| 12 | 7049  | 7387  | + | 339  | 112 | hypothetical protein                          | YP_009195202.1 | -                              |
| 13 | 7414  | 7668  | + | 255  | 84  | hypothetical protein                          | YP_008320349.1 | -                              |
| 14 | 7728  | 10364 | + | 2637 | 878 | tail tape measure protein                     | YP_008320350.1 | -                              |
| 15 | 10361 | 11212 | + | 852  | 283 | tail protein                                  | YP_008320351.1 | -                              |
| 16 | 11215 | 12333 | + | 1119 | 372 | <i>Siphovirus</i> ReqiPepy6 Gp37-like protein | YP_008320352.1 | -                              |
| 17 | 12330 | 13412 | + | 1083 | 360 | tail protein                                  | YP_009201927.1 | -                              |
| 18 | 13413 | 13760 | + | 348  | 115 | hypothetical protein                          | YP_009201928.1 | -                              |
| 19 | 13757 | 13918 | + | 162  | 53  | hypothetical protein                          | YP_009197964.1 | -                              |
| 20 | 13899 | 14138 | + | 240  | 79  | hypothetical protein                          | YP_009197965.1 | -                              |
| 21 | 14135 | 14809 | + | 675  | 224 | N-acetylmuramoyl-L-alanine amidase            | YP_009201931.1 | -                              |
| 22 | 14819 | 15061 | + | 243  | 80  | holin                                         | YP_009197967.1 | -                              |
| 23 | 15195 | 15386 | + | 192  | 63  | hypothetical protein                          | YP_009197968.1 | -                              |
| 24 | 15668 | 15778 | + | 111  | 36  | hypothetical protein                          | YP_009197969.1 | -                              |
| 25 | 15775 | 16296 | + | 522  | 173 | amidase domain-containing protein             | YP_009197970.1 | Potential reading frame shift. |
| 26 | 16293 | 16481 | + | 189  | 62  | amidase domain-containing protein             | YP_009197970.1 |                                |
| 27 | 16517 | 17041 | + | 525  | 174 | hypothetical protein                          | YP_009197971.1 | -                              |
| 28 | 17205 | 17312 | + | 108  | 35  | hypothetical protein                          | YP_009197972.1 | -                              |
| 29 | 17374 | 18288 | - | 915  | 304 | transposase                                   | YP_009201939.1 | -                              |
| 30 | 18344 | 19012 | - | 669  | 222 | helix-turn-helix domain-containing protein    | YP_009197974.1 | -                              |
| 31 | 19498 | 19701 | - | 204  | 67  | hypothetical protein                          | YP_009197976.1 | -                              |

|    |       |       |   |      |     |                                                |                |   |
|----|-------|-------|---|------|-----|------------------------------------------------|----------------|---|
| 32 | 19703 | 20251 | - | 549  | 182 | YoID-like family protein                       | YP_009197977.1 | - |
| 33 | 20493 | 20747 | + | 255  | 84  | transposase                                    | YP_009197978.1 | - |
| 34 | 20945 | 21634 | - | 690  | 229 | transposase                                    | YP_009197979.1 | - |
| 35 | 21640 | 21921 | - | 282  | 93  | helix-turn-helix<br>transcriptional regulator  | YP_009197980.1 | - |
| 36 | 22631 | 23092 | - | 462  | 153 | helix-turn-helix domain-<br>containing protein | YP_009197981.1 | - |
| 37 | 23293 | 23550 | + | 258  | 85  | hypothetical protein                           | YP_009201956.1 | - |
| 38 | 23696 | 23851 | + | 156  | 51  | hypothetical protein                           | YP_009201956.1 | - |
| 39 | 23877 | 24617 | + | 741  | 246 | antirepressor                                  | YP_009197983.1 | - |
| 40 | 24644 | 24862 | + | 219  | 72  | hypothetical protein                           | YP_009201958.1 | - |
| 41 | 24886 | 25155 | + | 270  | 89  | hypothetical protein                           | YP_009201959.1 | - |
| 42 | 25152 | 25424 | + | 273  | 90  | hypothetical protein                           | YP_009201960.1 | - |
| 43 | 25451 | 26209 | + | 759  | 252 | antirepressor                                  | YP_009201961.1 | - |
| 44 | 26206 | 26685 | + | 480  | 159 | hypothetical protein                           | YP_009201962.1 | - |
| 45 | 26675 | 26923 | + | 249  | 82  | hypothetical protein                           | YP_009201963.1 | - |
| 46 | 26928 | 27218 | + | 291  | 96  | hypothetical protein                           | YP_009197985.1 | - |
| 47 | 27202 | 28734 | + | 1533 | 510 | ATPase                                         | YP_009197986.1 | - |
| 48 | 28721 | 28918 | + | 198  | 65  | hypothetical protein                           | YP_009197987.1 | - |
| 49 | 28921 | 29823 | + | 903  | 300 | recombinase RecT                               | YP_009197988.1 | - |
| 50 | 29836 | 30594 | + | 759  | 252 | MBL fold metallo-<br>hydrolase                 | YP_009197989.1 | - |
| 51 | 30591 | 30905 | + | 315  | 104 | hypothetical protein                           | YP_008320387.1 | - |
| 52 | 30919 | 31749 | + | 831  | 276 | hypothetical protein                           | YP_008320388.1 | - |
| 53 | 31715 | 33037 | + | 1323 | 440 | DNA helicase                                   | YP_009197992.1 | - |
| 54 | 33034 | 33345 | + | 312  | 103 | hypothetical protein                           | YP_009201972.1 | - |
| 55 | 33338 | 34393 | + | 1056 | 351 | DNA (cytosine-5-)-<br>methyltransferase        | YP_009201973.1 | - |

|    |       |       |   |      |     |                                                            |                |   |
|----|-------|-------|---|------|-----|------------------------------------------------------------|----------------|---|
| 56 | 34380 | 34589 | + | 210  | 69  | hypothetical protein                                       | YP_009201974.1 | - |
| 57 | 34674 | 34844 | - | 171  | 56  | hypothetical protein                                       | -              | - |
| 58 | 34880 | 35470 | + | 591  | 196 | resolvase                                                  | YP_009838694.1 | - |
| 59 | 35629 | 36087 | + | 459  | 152 | hypothetical protein                                       | YP_009201977.1 | - |
| 60 | 36138 | 36596 | + | 459  | 152 | hypothetical protein                                       | YP_009201978.1 | - |
| 61 | 36608 | 36889 | + | 282  | 93  | hypothetical protein                                       | YP_009201979.1 | - |
| 62 | 36828 | 38390 | + | 1563 | 520 | integrase                                                  | YP_009201980.1 | - |
| 63 | 38530 | 38805 | + | 276  | 91  | phosphomannomutase                                         | YP_009201981.1 | - |
| 64 | 38834 | 39244 | - | 411  | 136 | type II toxin-antitoxin<br>system HicB family<br>antitoxin | YP_009201982.1 | - |
| 65 | 39275 | 39511 | - | 237  | 78  | type II toxin-antitoxin<br>system HicA family toxin        | YP_009201983.1 | - |
| 66 | 40487 | 40753 | + | 267  | 88  | transglycosylase                                           | YP_009201986.1 | - |
| 67 | 40750 | 41031 | + | 282  | 93  | HNH endonuclease                                           | YP_009201987.1 | - |

Table S5. Annotation table of phage 5/A

| # | Location |      | Strand | Size |     | Probable function        | Homologue      | Comments |
|---|----------|------|--------|------|-----|--------------------------|----------------|----------|
|   | Start    | End  |        | nt   | aa  |                          |                |          |
| 1 | 1        | 303  | +      | 303  | 100 | terminase, small subunit | YP_009195191.1 | -        |
| 2 | 284      | 2008 | +      | 1725 | 574 | terminase, large subunit | YP_008320338.1 | -        |
| 3 | 2005     | 3258 | +      | 1254 | 417 | portal protein           | YP_009203205.1 | -        |
| 4 | 3242     | 3964 | +      | 723  | 240 | Clp, protease            | YP_009203206.1 | -        |
| 5 | 3961     | 5091 | +      | 1131 | 376 | major capsid protein     | YP_008320341.1 | -        |

|    |       |       |   |      |     |                                        |                |                                |
|----|-------|-------|---|------|-----|----------------------------------------|----------------|--------------------------------|
| 6  | 5069  | 5242  | + | 174  | 57  | hypothetical protein                   | YP_008320342.1 | -                              |
| 7  | 5257  | 5427  | + | 171  | 56  | hypothetical protein                   | YP_008320343.1 | Potential reading frame shift. |
| 8  | 5506  | 5823  | + | 318  | 105 | head closure protein                   | YP_008320344.1 | -                              |
| 9  | 5823  | 6251  | + | 429  | 142 | hypothetical protein                   | YP_008320345.1 | -                              |
| 10 | 6235  | 6630  | + | 396  | 131 | tail protein                           | YP_008320346.1 | -                              |
| 11 | 6632  | 7069  | + | 438  | 145 | major tail protein                     | YP_008320347.1 | -                              |
| 12 | 7066  | 7404  | + | 339  | 112 | hypothetical protein                   | YP_009195202.1 | -                              |
| 13 | 7431  | 7685  | + | 255  | 84  | hypothetical protein                   | YP_008320349.1 | -                              |
| 14 | 7745  | 10282 | + | 2538 | 845 | hypothetical protein                   | YP_008320350.1 | Potential reading frame shift. |
| 15 | 10279 | 11130 | + | 852  | 283 | tail protein                           | YP_008320351.1 | -                              |
| 16 | 11133 | 12251 | + | 1119 | 372 | Siphovirus ReqiPepy6 Gp37-like protein | YP_008320352.1 | -                              |
| 17 | 12248 | 13330 | + | 1083 | 360 | tail protein                           | YP_009201927.1 | -                              |
| 18 | 13331 | 13678 | + | 348  | 115 | hypothetical protein                   | YP_009201928.1 | -                              |
| 19 | 13675 | 13836 | + | 162  | 53  | hypothetical protein                   | YP_009197964.1 | -                              |
| 20 | 13817 | 14056 | + | 240  | 79  | hypothetical protein                   | YP_009197965.1 | -                              |
| 21 | 14053 | 14727 | + | 675  | 224 | N-acetylmuramoyl-L-alanine amidase     | YP_009201931.1 | -                              |
| 22 | 14737 | 14979 | + | 243  | 80  | holin                                  | YP_009197967.1 | -                              |
| 23 | 15113 | 15304 | + | 192  | 63  | hypothetical protein                   | YP_009197968.1 | -                              |
| 24 | 15586 | 15696 | + | 111  | 36  | hypothetical protein                   | YP_009197969.1 | -                              |
| 25 | 15693 | 16214 | + | 522  | 173 | amidase domain-containing protein      | YP_009197970.1 | -                              |
| 26 | 16211 | 16399 | + | 189  | 62  | amidase domain-containing protein      | YP_009197970.1 | -                              |
| 27 | 16435 | 16959 | + | 525  | 174 | hypothetical protein                   | YP_009197971.1 | -                              |
| 28 | 17123 | 17230 | + | 108  | 35  | hypothetical protein                   | YP_009197972.1 | -                              |

|    |       |       |   |      |     |                                            |                |   |
|----|-------|-------|---|------|-----|--------------------------------------------|----------------|---|
| 29 | 17292 | 18011 | - | 720  | 239 | transposase                                | YP_009201939.1 | - |
| 30 | 18182 | 18865 | - | 684  | 227 | helix-turn-helix domain-containing protein | YP_009197974.1 | - |
| 31 | 19351 | 19554 | - | 204  | 67  | hypothetical protein                       | YP_009197976.1 | - |
| 32 | 19556 | 20104 | - | 549  | 182 | YolD-like family protein                   | YP_009197977.1 | - |
| 33 | 20346 | 20600 | + | 255  | 84  | transposase                                | YP_009197978.1 | - |
| 34 | 20798 | 21487 | - | 690  | 229 | transposase                                | YP_009197979.1 | - |
| 35 | 21493 | 21774 | - | 282  | 93  | helix-turn-helix transcriptional regulator | YP_009197980.1 | - |
| 36 | 22484 | 22945 | - | 462  | 153 | helix-turn-helix domain-containing protein | YP_009197981.1 | - |
| 37 | 23146 | 23403 | + | 258  | 85  | hypothetical protein                       | YP_009201956.1 | - |
| 38 | 23549 | 23704 | + | 156  | 51  | hypothetical protein                       | YP_009201956.1 | - |
| 39 | 23730 | 24470 | + | 741  | 246 | antirepressor                              | YP_009197983.1 | - |
| 40 | 24497 | 24715 | + | 219  | 72  | hypothetical protein                       | YP_009201958.1 | - |
| 41 | 24739 | 25008 | + | 270  | 89  | hypothetical protein                       | YP_009201959.1 | - |
| 42 | 25005 | 25277 | + | 273  | 90  | hypothetical protein                       | YP_009201960.1 | - |
| 43 | 25304 | 26062 | + | 759  | 252 | antirepressor                              | YP_009201961.1 | - |
| 44 | 26059 | 26538 | + | 480  | 159 | hypothetical protein                       | YP_009201962.1 | - |
| 45 | 26528 | 26776 | + | 249  | 82  | hypothetical protein                       | YP_009201963.1 | - |
| 46 | 26781 | 27071 | + | 291  | 96  | hypothetical protein                       | YP_009197985.1 | - |
| 47 | 27055 | 28587 | + | 1533 | 510 | ATPase                                     | YP_009197986.1 | - |
| 48 | 28574 | 28771 | + | 198  | 65  | hypothetical protein                       | YP_009197987.1 | - |
| 49 | 28774 | 29676 | + | 903  | 300 | recombinase RecT                           | YP_009197988.1 | - |
| 50 | 29689 | 30447 | + | 759  | 252 | MBL fold metallo-hydrolase                 | YP_009197989.1 | - |
| 51 | 30444 | 30758 | + | 315  | 104 | hypothetical protein                       | YP_008320387.1 | - |
| 52 | 30772 | 31602 | + | 831  | 276 | hypothetical protein                       | YP_008320388.1 | - |
| 53 | 31568 | 32890 | + | 1323 | 440 | DNA helicase                               | YP_009197992.1 | - |

|    |       |       |   |      |     |                                                      |                |                                |
|----|-------|-------|---|------|-----|------------------------------------------------------|----------------|--------------------------------|
| 54 | 32887 | 33198 | + | 312  | 103 | hypothetical protein                                 | YP_009201972.1 | -                              |
| 55 | 33191 | 34246 | + | 1056 | 351 | DNA (cytosine-5-)-methyltransferase                  | YP_009201973.1 | -                              |
| 56 | 34233 | 34442 | + | 210  | 69  | hypothetical protein                                 | YP_009201974.1 | -                              |
| 57 | 34527 | 34697 | - | 171  | 56  | hypothetical protein                                 | -              | -                              |
| 58 | 34733 | 35323 | + | 591  | 196 | resolvase                                            | YP_009838694.1 | -                              |
| 59 | 35482 | 35940 | + | 459  | 152 | hypothetical protein                                 | YP_009201977.1 | -                              |
| 60 | 35991 | 36449 | + | 459  | 152 | hypothetical protein                                 | YP_009201978.1 | -                              |
| 61 | 36681 | 37061 | + | 381  | 126 | integrase                                            | YP_009201980.1 | Potential reading frame shift. |
| 62 | 37064 | 38347 | + | 1284 | 427 | integrase                                            | YP_009201980.1 |                                |
| 63 | 38487 | 38762 | + | 276  | 91  | phosphomannomutase                                   | YP_009201981.1 | -                              |
| 64 | 38791 | 39201 | - | 411  | 136 | type II toxin-antitoxin system HicB family antitoxin | YP_009201982.1 | -                              |
| 65 | 39232 | 39468 | - | 237  | 78  | type II toxin-antitoxin system HicA family toxin     | YP_009201983.1 | -                              |
| 66 | 40444 | 40710 | + | 267  | 88  | transglycosylase                                     | YP_009201986.1 | -                              |
| 67 | 40707 | 41045 | + | 339  | 112 | HNH endonuclease                                     | YP_009201987.1 | -                              |
